# Supplementary material
Source: Springer Nature journal article supplement (https://www.springerprofessional.de/resource/supplementary/13638_2012_613_MOESM15_ESM.pdf/11898360)

**a**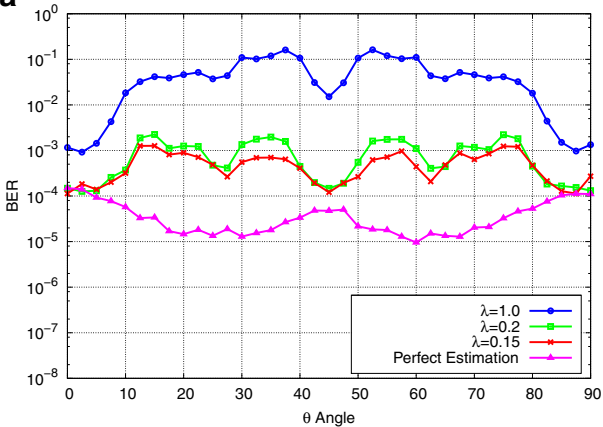

Amplitude Estimation Error (LMS algorithm used).

**b**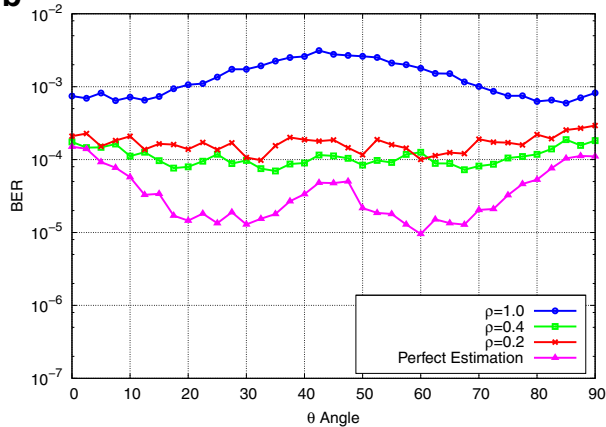

Phase Estimation Error (PLL algorithm used).

Supplement: MOESM15 [file 11898360]
